# Supplementary material for: Developing Guidelines On Code Status Conversations With Older Adults Upon Hospital Admission: Results From A Survey Of Experienced Healthcare Professionals
Source: Research Square preprint supplement (doi:10.21203/rs.3.rs-1326439/v1), 2022-02-14
Supplement: Supplementary file 1 [file a553b3b4fc86830fea0e9bc4.docx]

**Appendix 1**

Research equation for PubMed

(((discuss*[Title/Abstract]) OR (communicat*[Title/Abstract])) AND ((CPR[Title/Abstract]) OR (DNR[Title/Abstract]) OR (resuscitat*[Title/Abstract]) OR (DNAR[Title/Abstract]) OR (“code status”[Title/Abstract]) OR (DNACPR[Title/Abstract])) AND ((consensus[Title/Abstract]) OR (guide*[Title/Abstract]) OR (statement*[Title/Abstract]) OR (training*[Title/Abstract]) OR (teach*[Title/Abstract]) OR (education*[Title/Abstract]) OR (checklist*[Title/Abstract]) OR (tip*[Title/Abstract]) OR (recommend*[Title/Abstract]) OR (tool*[Title/Abstract]) OR (strategy*[Title/Abstract]) OR (approach[Title/Abstract]) OR (video*[Title/Abstract]) OR (model*[Title/Abstract]) OR (suggest*[Title/Abstract]) OR (policy*[Title/Abstract]) OR (step*[Title/Abstract]) OR (intervention[Title/Abstract]) OR (script*[Title/Abstract]) OR (scenario*[Title/Abstract])) AND ((physician*[Title/Abstract]) OR (resident[Title/Abstract]) OR (medical [Title/Abstract]) OR (doctor*[Title/Abstract]) OR (clincian*[Title/Abstract])))

**Appendix 2**

References of the 53 articles identified through the systematic literature review

1. Ackermann, R.J., *Withholding and withdrawing life-sustaining treatment.* Am Fam Physician, 2000. **62**(7): p. 1555-60, 1562, 1564.
2. Agård, A., G. Hermerén, and J. Herlitz, *Should cardiopulmonary resuscitation be performed on patients with heart failure? The role of the patient in the decision-making process.* J Intern Med, 2000. **248**(4): p. 279-86.
3. Agich, G.J. and A.C. Arroliga, *Appropriate use of DNR orders: a practical approach.* Cleve Clin J Med, 2000. **67**(6): p. 392, 395, 399-400.
4. Anderson, W.G., et al., *Code status discussions between attending hospitalist physicians and medical patients at hospital admission.* J Gen Intern Med, 2011. **26**(4): p. 359-66.
5. Anderson, W.G., J.W. Cimino, and B. Lo, *Seriously ill hospitalized patients' perspectives on the benefits and harms of two models of hospital CPR discussions.* Patient Educ Couns, 2013. **93**(3): p. 633-40.
6. Andreassen, P., et al., *Talking about sensitive topics during the advance care planning discussion: A peek into the black box.* Palliat Support Care, 2015. **13**(6): p. 1669-76.
7. Aronson, S.G. and R.W. Kirby, *Improving knowledge and communication through an advance directives objective structured clinical examination.* J Palliat Med, 2002. **5**(6): p. 916-9.
8. Balaban, R.B., *A physician's guide to talking about end-of-life care.* J Gen Intern Med, 2000. **15**(3): p. 195-200.
9. Binder, A.F., G.C. Huang, and M.K. Buss, *Uninformed consent: Do medicine residents lack the proper framework for code status discussions?* J Hosp Med, 2016. **11**(2): p. 111-6.
10. Cheng, Y.H., et al., *The training in SHARE communication course by physicians increases the signing of do-not-resuscitate orders for critical patients in the emergency room (cross-sectional study).* Int J Surg, 2019. **68**: p. 20-26.
11. Deep, K.S., C.H. Griffith, and J.F. Wilson, *Discussing preferences for cardiopulmonary resuscitation: what do resident physicians and their hospitalized patients think was decided?* Patient Educ Couns, 2008. **72**(1): p. 20-5.
12. Downar, J. and L. Hawryluck, *What should we say when discussing "code status" and life support with a patient? A Delphi analysis.* J Palliat Med, 2010. **13**(2): p. 185-95.
13. Downar, J., et al., *Why do patients agree to a "Do not resuscitate" or "Full code" order? Perspectives of medical inpatients.* J Gen Intern Med, 2011. **26**(6): p. 582-7.
14. Ebell, M.H., D.J. Doukas, and M.A. Smith, *The do-not-resuscitate order: a comparison of physician and patient preferences and decision-making.* Am J Med, 1991. **91**(3): p. 255-60.
15. Frank, C., et al., *Determining resuscitation preferences of elderly inpatients: a review of the literature.* Cmaj, 2003. **169**(8): p. 795-9.
16. Garrett, J.M., et al., *Life-sustaining treatments during terminal illness: who wants what?* J Gen Intern Med, 1993. **8**(7): p. 361-8.
17. Groarke, J., J. Gallagher, and R. McGovern, *Conflicting perspectives compromising discussions on cardiopulmonary resuscitation.* Ir Med J, 2010. **103**(8): p. 233-5.
18. Harkness, M. and P. Wanklyn, *Cardiopulmonary resuscitation: capacity, discussion and documentation.* Qjm, 2006. **99**(10): p. 683-90.
19. Hawryluck, L., S.J. Oczkowski, and M. Handelman, *"Must do CPR??": strategies to cope with the new College of Physicians and Surgeons of Ontario policy on end-of-life care.* Can J Anaesth, 2016. **63**(8): p. 973-80.
20. Jacobsen, J., et al., *“I'd recommend…” how to incorporate your recommendation into shared decision making for patients with serious illness.* Journal of pain and symptom management, 2018. **55**(4): p. 1224-1230.
21. Jacobsen, J., et al., *Development of a cognitive model for advance care planning discussions: results from a quality improvement initiative.* J Palliat Med, 2011. **14**(3): p. 331-6.
22. Kaldjian, L.C. and A. Broderick, *Developing a policy for do not resuscitate orders within a framework of goals of care.* Jt Comm J Qual Patient Saf, 2011. **37**(1): p. 11-9.
23. Kaldjian, L.C., et al., *Code status discussions and goals of care among hospitalised adults.* J Med Ethics, 2009. **35**(6): p. 338-42.
24. Kidd, A.C., et al., *Does medical futility matter in 'do not attempt CPR' decision-making?* Int J Clin Pract, 2014. **68**(10): p. 1190-2.
25. Laakkonen, M.L., et al., *Older people's reasoning for resuscitation preferences and their role in the decision-making process.* Resuscitation, 2005. **65**(2): p. 165-71.
26. Levinson, M., et al., *Language and understanding of cardiopulmonary resuscitation amongst an aged inpatient population.* Psychol Health Med, 2017. **22**(2): p. 227-236.
27. Loertscher, L., et al., *Cardiopulmonary resuscitation and do-not-resuscitate orders: a guide for clinicians.* Am J Med, 2010. **123**(1): p. 4-9.
28. Low, C., et al., *Palliative care staff's perceptions of do not attempt cardiopulmonary resuscitation discussions.* Int J Palliat Nurs, 2014. **20**(7): p. 327-33.
29. Margolis, B., et al., *Educational Intervention to Improve Code Status Discussion Proficiency Among Obstetrics and Gynecology Residents.* Am J Hosp Palliat Care, 2018. **35**(4): p. 724-730.
30. Miller, A. and B. Lo, *How do doctors discuss do-not-resuscitate orders?* West J Med, 1985. **143**(2): p. 256-8.
31. Nicolasora, N., et al., *If asked, hospitalized patients will choose whether to receive life-sustaining therapies.* J Hosp Med, 2006. **1**(3): p. 161-7.
32. Palathra, B.C., et al., *To Code or Not To Code: Teaching Multidisciplinary Clinicians to Conduct Code Status Discussions.* J Palliat Med, 2019. **22**(5): p. 566-571.
33. Pentz, R.D., et al., *Discussion of the do-not-resuscitate order: a pilot study of perceptions of patients with refractory cancer.* Support Care Cancer, 2002. **10**(8): p. 573-8.
34. Real de Asúa, D., et al., *We don't need unilateral DNRs: taking informed non-dissent one step further.* J Med Ethics, 2019. **45**(5): p. 314-317.
35. Rhondali, W., et al., *Patient-physician communication about code status preferences: a randomized controlled trial.* Cancer, 2013. **119**(11): p. 2067-73.
36. Richtering, S.S., P. Darbellay Farhoumand, and M. Escher, *[Would you want to be resuscitated if you heart stops Code status discussions in the hospital setting].* Rev Med Suisse, 2018. **14**(623): p. 1854-1858.
37. Rubli Truchard, E., A.C. Sterie, and R.J. Jox, *[Resuscitation of elderly people : how to approach their preferences in advance].* Rev Med Suisse, 2017. **13**(548): p. 320-322.
38. Shah, K., M. Swinton, and J.J. You, *Barriers and facilitators for goals of care discussions between residents and hospitalised patients.* Postgrad Med J, 2017. **93**(1097): p. 127-132.
39. Sharma, R.K., et al., *Goals-of-Care Decisions by Hospitalized Patients With Advanced Cancer: Missed Clinician Opportunities for Facilitating Shared Decision-Making.* J Pain Symptom Manage, 2019. **58**(2): p. 216-223.
40. Sharma, R.K., et al., *Unpacking resident-led code status discussions: results from a mixed methods study.* J Gen Intern Med, 2014. **29**(5): p. 750-7.
41. Smith, C.B. and L. Bunch O'Neill, *Do not resuscitate does not mean do not treat: how palliative care and other modalities can help facilitate communication about goals of care in advanced illness.* Mt Sinai J Med, 2008. **75**(5): p. 460-5.
42. Szmuilowicz, E., et al., *Improving residents' code status discussion skills: a randomized trial.* J Palliat Med, 2012. **15**(7): p. 768-74.
43. Tang, S.T., et al., *Preferences for Life-Sustaining Treatments and Associations With Accurate Prognostic Awareness and Depressive Symptoms in Terminally Ill Cancer Patients' Last Year of Life.* J Pain Symptom Manage, 2016. **51**(1): p. 41-51.e1.
44. Teixeira, C. and P.R.C. Cardoso, *How to discuss about do-not-resuscitate in the intensive care unit?* Rev Bras Ter Intensiva, 2019. **31**(3): p. 386-392.
45. Tulsky, J.A., M.A. Chesney, and B. Lo, *How do medical residents discuss resuscitation with patients?* J Gen Intern Med, 1995. **10**(8): p. 436-42.
46. Ventres, W., et al., *Do-not-resuscitate discussions: a qualitative analysis.* Fam Pract Res J, 1992. **12**(2): p. 157-69.
47. von Gunten, C.F. and D.E. Weissman, *Discussing do-not-resuscitate orders in the hospital setting: part 1.* Journal of palliative medicine, 2002. **5**(3): p. 415-417.
48. von Gunten, C.F. and D.E. Weissman, *Discussing do-not-resuscitate orders in the hospital setting: Part 2.* Journal of palliative medicine, 2002. **5**(3): p. 417-418.
49. von Gunten, C.F., *Discussing do-not-resuscitate status.* Journal of Clinical Oncology, 2001. **19**(5): p. 1576-1581.
50. Waldron, N., et al., *Development of a video-based education and process change intervention to improve advance cardiopulmonary resuscitation decision-making.* BMC Health Serv Res, 2016. **16**(1): p. 555.
51. Wee, S., et al., *Cardiopulmonary resuscitation-from the patient's perspective.* Anaesth Intensive Care, 2017. **45**(3): p. 344-350.
52. White, J. and E.K. Fromme, *"In the beginning...": tools for talking about resuscitation and goals of care early in the admission.* Am J Hosp Palliat Care, 2013. **30**(7): p. 676-82.
53. Zijlstra, T.J., et al., *Knowledge and preferences regarding cardiopulmonary resuscitation: A survey among older patients.* Patient Educ Couns, 2016. **99**(1): p. 160-3.

**Appendix 3.**

Questionnaire

**I. Professional data**

Profession :

Domain of certification :

Number of years of experience at the hospital :

**II. QUESTIONNAIRE**

You will find here 11 statements, based on the scientific literature, concerning how the encounter during which physicians discuss cardio-pulmonary resuscitation with their geriatric patients should be led. For each of these statements, please indicate if you agree or not with what is suggested and explain why. If agreeing with the statement, please indicate whether this seems very important, relatively important, of little importance, or not important at all.

1. ***At the start of the discussion on cardio-pulmonary resuscitation, the physician should clarify what the patient knows about her/his medical state and, if needed, help her/him better understand the prognosis.***

a. 🞎Agree 🞎Not agree

b. Why ?

c. According to you, this statement is:

very important / relatively important / of little importance / not important at al.

1. ***The physician should not talk about cardio-pulmonary resuscitation during the first minutes of the admission interview.***

a. 🞎Agree 🞎Not agree

b. Why ?

c. According to you, this statement is:

very important / relatively important / of little importance / not important at al.

1. ***The physician should approach CPR in the context of the goals of care discussion, striving to clarify the patient’s values, aims, preferences, and expectations.***

a. 🞎Agree 🞎Not agree

b. Why ?

c. According to you, this statement is:

very important / relatively important / of little importance / not important at al.

1. ***The physician should explain to the patient what cardiac arrest is, and what the different options of intervention are.***

a. 🞎Agree 🞎Not agree

b. Why ?

c. According to you, this statement is:

very important / relatively important / of little importance / not important at al.

1. ***When a patient wants to be resuscitated, the physician should explain the whole process: resuscitation, objectives, intensive care, risks, impact on the illness, chances of attaining goals of care and factors influencing the success of the process.***

a. 🞎Agree 🞎Not agree

b. Why ?

c. According to you, this statement is:

very important / relatively important / of little importance / not important at al.

1. ***When a patient wants to be resuscitated, the physician should explain to what extent this would lead to meeting her/his expectations, reducing her/his worries, reaching her/his goals and respecting her/his values.***

a. 🞎Agree 🞎Not agree

b. Why ?

c. According to you, this statement is:

very important / relatively important / of little importance / not important at al.

1. ***The physician should share the medical indication about CPR with the patient, taking into account the clinical situation and the goals of care.***

a. 🞎Agree 🞎Not agree

b. Why ?

c. According to you, this statement is:

very important / relatively important / of little importance / not important at al.

1. ***The role of the physician is to engage the patient in a reflection about her/his prognosis and treatment options in order to guide her/him towards shared decision making.***

a. 🞎Agree 🞎Not agree

b. Why ?

c. According to you, this statement is:

very important / relatively important / of little importance / not important at al.

1. ***When the patient expresses a preference, the physician should explore the reasons behind it by asking what these preferences mean for her/him.***

a. 🞎Agree 🞎Not agree

b. Why ?

c. According to you, this statement is:

very important / relatively important / of little importance / not important at al.

1. ***If the patient wants to be resuscitated but such a procedure is not medically indicated, the physician should ask her/him about the reasons behind this choice and explain why CPR will not be performed, in the patient’s best interests.***

a. 🞎Agree 🞎Not agree

b. Why ?

c. According to you, this statement is:

very important / relatively important / of little importance / not important at al.

1. ***If the patient is undecided, the physician should summarize what she/he has said until then, propose a recommendation in a direct manner (for example, “from what you tell me…”), and, if needed, continue the discussion later on.***

a. 🞎Agree 🞎Not agree

b. Why ?

c. According to you, this statement is:

very important / relatively important / of little importance / not important at al.

**III. ADDITIONAL RECOMMENDATIONS**

Do you have any additional recommendations that should be taken into account during the discussion about CPR and goals of care with geriatric patients ? Please indicate them below.

1.

2.

3.
